# Supplementary material for: Development of anchialine cave habitats and karst subterranean estuaries since the last ice age
Source: PubMed Central journal article supplement (PMC6695480; doi:10.1038/s41598-019-48058-8), 2019-08-15
Supplement: 41598_2019_48058_MOESM1_ESM.pdf [file 41598_2019_48058_MOESM1_ESM.pdf]

## Online Supplementary Information

### **Development of anchialine cave habitats and karst subterranean estuaries since the last ice age**

Peter J. van Hengstum<sup>1,2,\*</sup>, Jacque N. Cresswell<sup>3</sup>, Glenn A. Milne<sup>4</sup>, and Thomas M. Iliffe<sup>3</sup>

1. Department of Marine Sciences, Texas A&M University at Galveston, Galveston, Texas, 77554

2. Department of Oceanography, Texas A&M University, College Station, Texas, 77843

3. Department of Marine Biology, Texas A&M University at Galveston, Galveston, Texas, 77554

4. Department of Earth and Environmental Sciences, Ottawa, Ontario, Canada, K1N 6N5

\*Corresponding author: vanhenp@tamug.edu

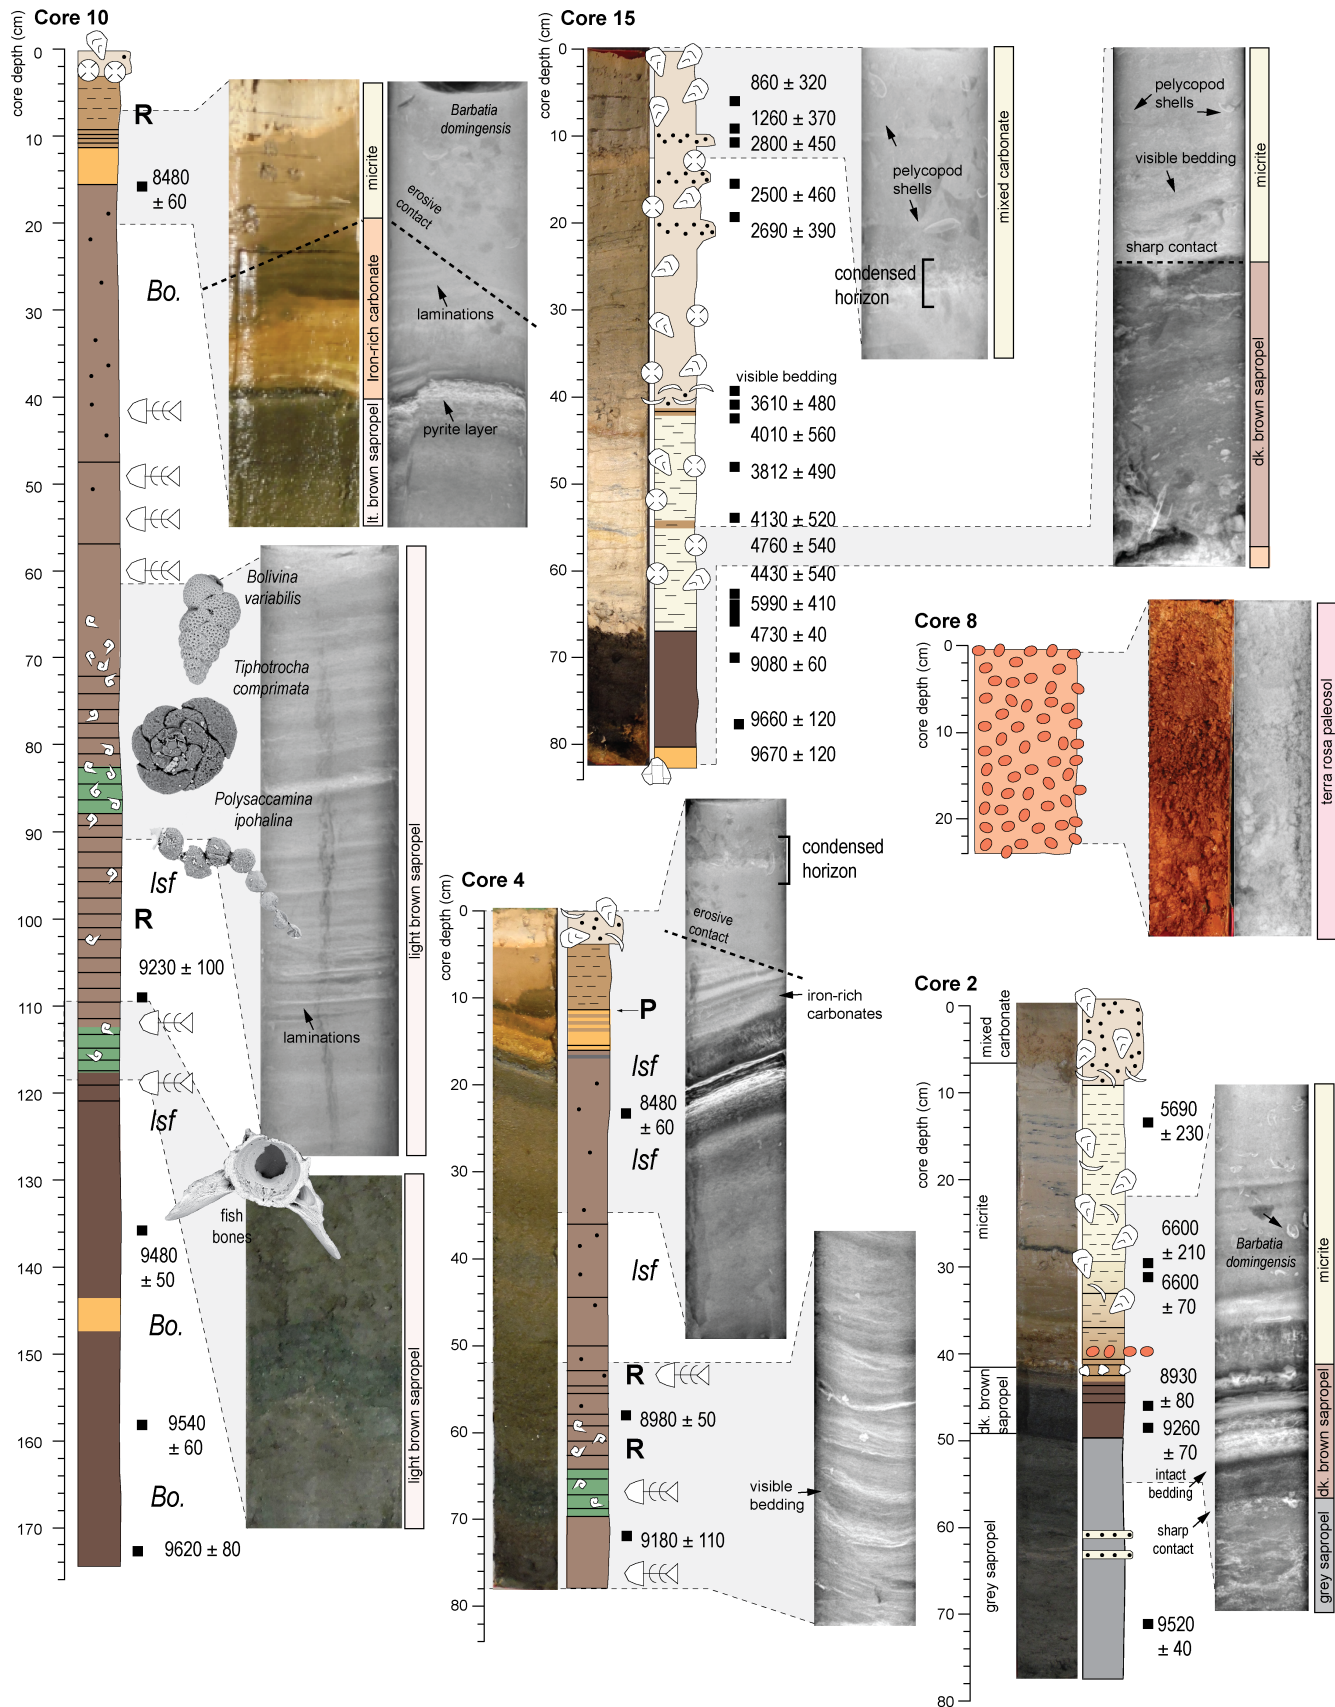

**Figure S1** | Representative photographs and radiographs for key sedimentary units and transitions, along with the cores logs (and symbols) from the figure in the main text.

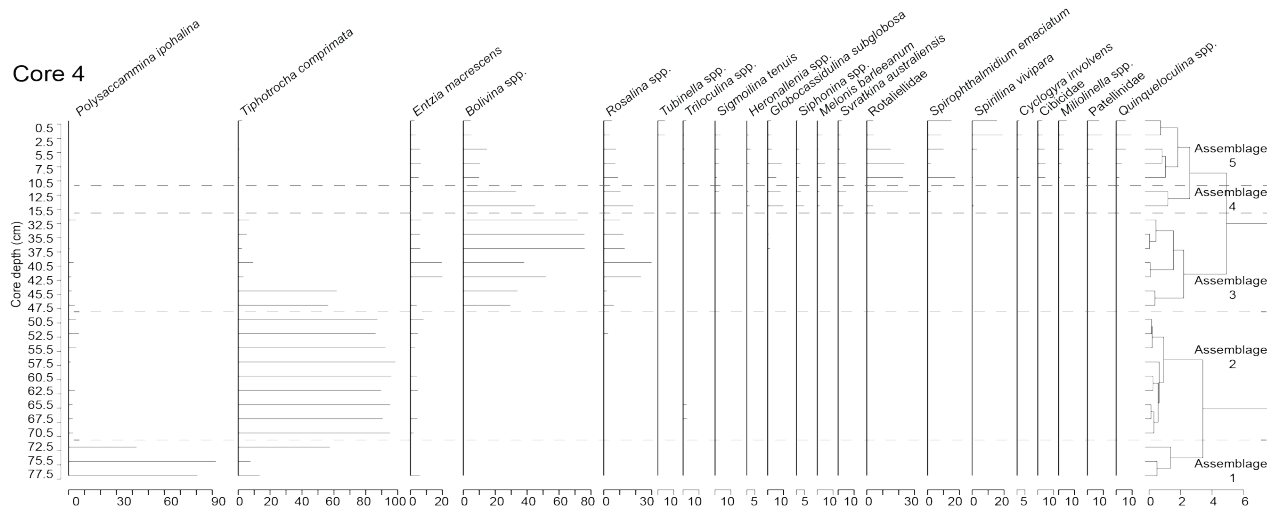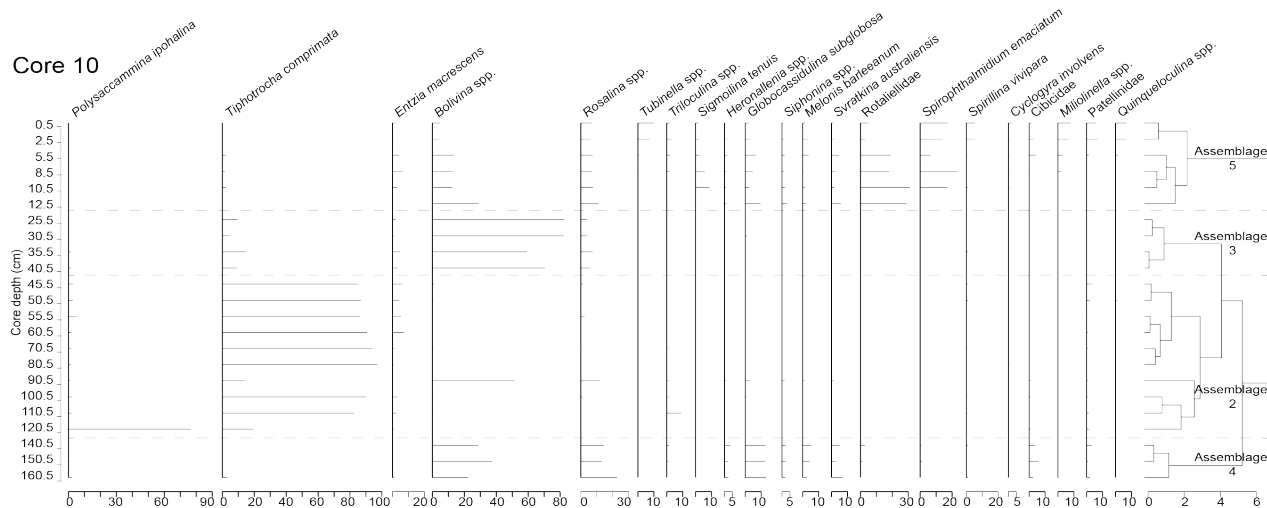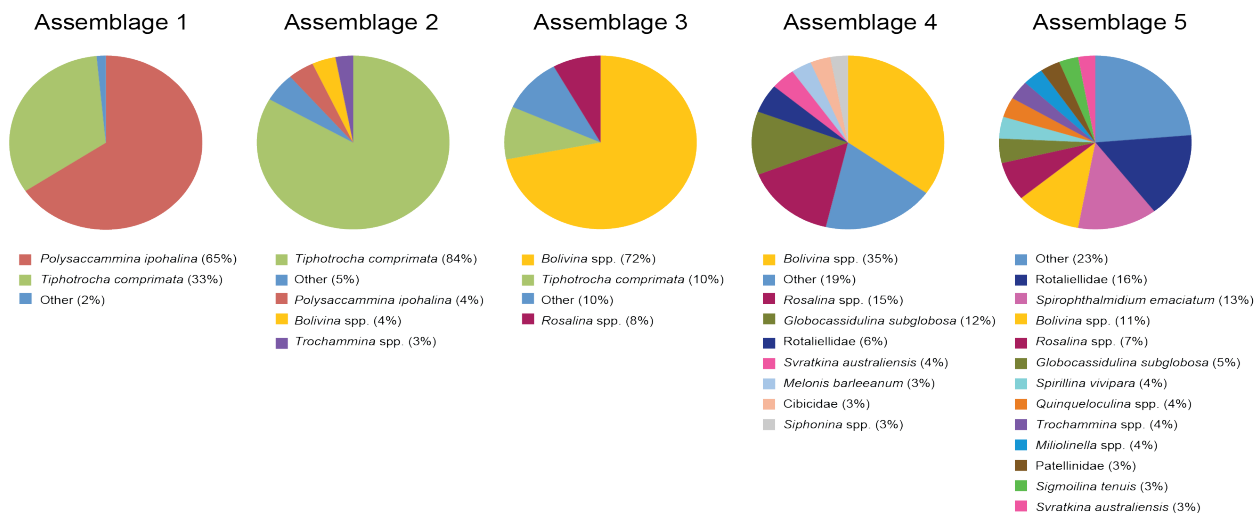

**Figure S2|** Downcore proportional abundance of dominant benthic foraminifera in cores 4 and 10. Assemblages of foraminifera were identified with Dendrograms produced from Q-mode stratigraphically-constrained cluster analysis on statistically significant taxa<sup>1</sup>. Benthic foraminifera were rare between in core 4 from 15.5 to 32.5 cm, and in core 10 from 12.5 to 25.5 cm, but *Bolivina* sp. was observed.

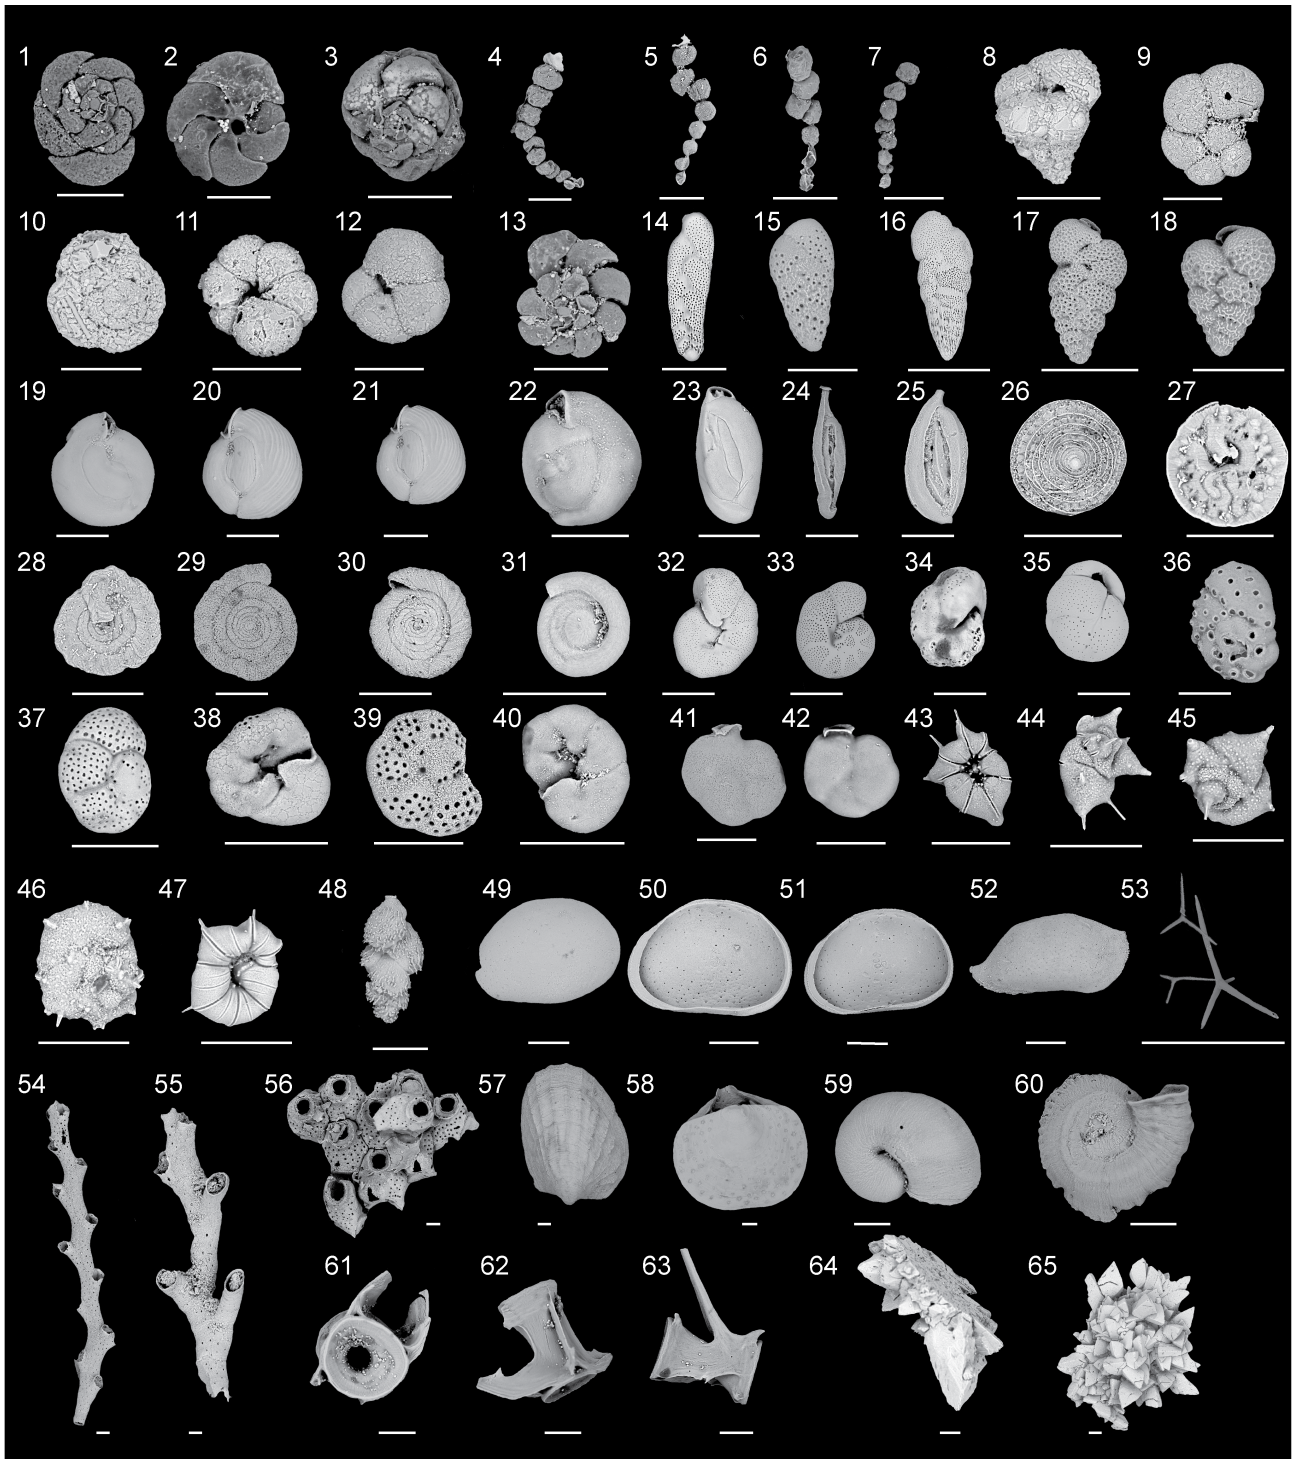

**Figure S3|** Representative Scanning electron micrographs of significant biological and sedimentary remains preserved in the different sedimentary units from core 4 and 10 (1-48, benthic foraminifera; 49- 65, other). Benthic foraminiferal taxonomy followed published regional<sup>2,3</sup> and international literature<sup>4</sup>. 1-3, Dorsal and ventral views of *Tiphotrecha comprimata* (Cushman & Brönnimann, 1948). 4-7, *Polysaccamina ipohalina* (Scott, 1976). 8, *Eggerella scabra* (Williamson, 1858). 9, *Labrospira evoluta* (Natland, 1938). 10-12, Dorsal and ventral views of *Trochammina quadriloba* (Höglund, 1948). 13, *Entzia macrescens* (Brady, 1870). 14, *Bolivina pseudopunctata* Höglund (1947). 15, *Bolivina paula* (Cushman and Ponton, 1932). 16, *Bolivina striatula* (Cushman, 1922). 17-18, *Bolivina variabilis* (Williamson, 1858). 19-22, *Miliolinella circularis* (Bornemann, 1855). 23, *Quinqueloculina bosciana* d,Orbigny (1846). 24, *Spirophthalmidium emaciatum* (Haynes, 1973). 25 *Sigmoilina tenuis* (Czjzek, 1848). 26-27, *Patellina corrugata* Williamson (1858). 28, *Mychostommina revertens* (Rhumbler, 1906). 29- 30, *Spirillina vivipara* (Ehrenberg, 1843). 31, *Cyclogyra involvens* (Reuss, 1850). 32-33, *Melonis barleeianum* (Williamson, 1858).



34, *Nonion pauperatum* (Balkwill & Wright, 1885). 35, *Globocassidulina subglobosa* (Brady, 1881). 36, Dorsal view of *Svratkina australiensis* (Chapman, Parr, & Collins, 1934). 37- 40, Dorsal and ventral views of *Rosalina* spp. 41-43, *Siphonina temblorensis* (Garrison, 1959). 43-45, Dorsal and ventral views of *Rotaliella arctica* (Scott & Vilks, 1991). 46-47, Dorsal and ventral views of *Heronallenita* spp. 48, *Trifarina occidentalis* (Cushman, 1922). 49 dorsal view of ostracode *Cypridopsis vidua* (Müller, 1776) 50-51, ventral view of ostracode *Cypridopsis vidua* (Müller, 1776), 52, dorsal view of *Paranesidea sterreri* Maddocks (1986). 53. Sponge spicules. 54- 55, Branching bryozoans. 56, Cheilostome bryozoan. 57, Bivalve. 58, Brachiopod. 59, Mollusk. 60, Encrusting tube-worm. 61- 63, Teleost (Fish) vertebrae. 64-65, Calcite rafts. All scale bars represent 100 µm.

**Table S1|** Detailed information on core locations in Palm Cave relative to the Earth’s surface. GPS co-ordinates were estimated from overlaying cave survey ( $\leq 3$  m horizontal uncertainty) in Google Earth ( $\pm 3$  m horizontal uncertainty).

| Core Label | Water Depth (m) | Water Depth Uncertainty | Latitude   | Longitude   | Core termination | Final core length (cm) |
|------------|-----------------|-------------------------|------------|-------------|------------------|------------------------|
| SM-C2      | 20.1            | 0.3                     | 32.345072° | -64.711072° | sediment         | 0.78                   |
| SM-C3      | 20.3            | 0.3                     | 32.345411° | -64.711962° | hardground       | 0.8                    |
| SM-C4      | 20.7            | 0.3                     | 32.345627° | -64.711658° | sediment         | 0.79                   |
| SM-C6      | 20.3            | 0.3                     | 32.345466° | -64.712108° | sediment         | 0.78                   |
| SM-C7      | 9.7             | 0.3                     | 32.345822° | -64.712690° | hardground       | 0.66                   |
| SM-C8      | 5.3             | 0.3                     | 32.345869° | -64.712214° | hardground       | 0.25                   |
| SM-C9      | 20.3            | 0.3                     | 32.345438° | -64.711141° | hardground       | 0.57                   |
| SM-C10     | 20.7            | 0.3                     | 32.344779  | -64.711037  | hardground       | 1.75                   |
| SM-C11     | 18              | 0.3                     | 32.346000° | -64.711450° | sediment         | 0.46                   |
| SM-C12     | 20.4            | 0.3                     | 32.345367° | -64.711143° | hardground       | 0.38                   |
| SM-C13     | 20.4            | 0.3                     | 32.345417° | -64.711189° | sediment         | 0.43                   |
| SM-C14     | 20.7            | 0.3                     | 32.345039° | -64.711257° | hardground       | 0.88                   |
| SM-C15     | 21.9            | 0.3                     | 32.345361° | -64.711628° | hardground       | 0.83                   |

**Table S2** Arithmetic averages for measured sedimentary characteristics in the recovered seven different sedimentary units and preserved biological remains. Note that the stable carbon isotopic ratio ( $\delta^{13}\text{C}_{\text{org}}$  ‰ VPDB, analytical uncertainty  $\pm 0.2\%$ ) and C:N (analytical uncertainty  $\pm 0.1\%$ ) were only determined on cores 3, 6, 10, 14, and 9 ( $n = 215$ ). Symbols for biological remains: ostracodes (o) and foraminifera (f).

| Sediment Group  | Sedimentary Unit     | Timing of Deposition<br>(Calibrated years before present)              | Maximum estimated sedimentation rate | Area of Deposition                                                        | Sediment Texture (mg/cc) | Organic Matter Geochemistry |                                             |                         | Preserved Biological Remains                                                                                                                                                               | Environmental Setting              |
|-----------------|----------------------|------------------------------------------------------------------------|--------------------------------------|---------------------------------------------------------------------------|--------------------------|-----------------------------|---------------------------------------------|-------------------------|--------------------------------------------------------------------------------------------------------------------------------------------------------------------------------------------|------------------------------------|
|                 |                      |                                                                        |                                      |                                                                           |                          | Bulk Organic Content (%)    | $\delta^{13}\text{C}_{\text{org}}$ (‰ VPDB) | C:N                     |                                                                                                                                                                                            |                                    |
| Paleosol        | Terra Rosa Paleosol  | >11,600                                                                |                                      | Base of deposits (core 13), exposed in areas with non-deposition (core 8) | 66 ± 49 ( $n = 38$ )     | 14 ± 1 ( $n = 38$ )         | Not analyzed                                | Not analyzed            | none                                                                                                                                                                                       | Vadose Cave                        |
| Organic Deposit | Grey Sapropel        | 9750 ± 210 to ~9400 (cores 14 and 2)                                   | 6 mm/yr (core 2)                     | Eastern passages only (core 14, core 2)                                   | 7 ± 11 ( $n = 89$ )      | 16 ± 4 ( $n = 89$ )         | -24.4 ± 0.6‰ ( $n = 33$ )                   | 17.2 ± 1.0 ( $n = 33$ ) | Darwinula stevensoni (o), Cypridopsis vidua (o)                                                                                                                                            | Oligohaline Meteoric Lens          |
| Organic Deposit | Dark Brown Sapropel  | 9620 ± 80 (core 10, 15) to 8520 ± 70 (core 3)                          | 1.6 mm/yr (core 10)                  | Deepest areas of Palm Cave                                                | 4 ± 4 ( $n = 177$ )      | 31 ± 8 ( $n = 180$ )        | -24.1 ± 0.9‰ ( $n = 43$ )                   | 16.8 ± 0.8 ( $n = 43$ ) | Polysaccamina ipohalina (f), Trochammina spp. (f), Trochammina spp. (f)-, fish vertebrae                                                                                                   |                                    |
| Organic Deposit | Light Brown Sapropel | ~9180 ± 110 (core 4) to 8370 ± 30 (core 3)                             | 1.25 mm/yr (core 10)                 | Proximal to Sailors Choice Entrance                                       | 9 ± 11 ( $n = 201$ )     | 24 ± 4 ( $n = 198$ )        | -23.5 ± 0.8‰ ( $n = 39$ )                   | 14.9 ± 1.1 ( $n = 39$ ) |                                                                                                                                                                                            |                                    |
| Iron-rich       | Iron and Carbonate   | After 8480 ± 60 (core 10)                                              | inadequately constrained             | Above limestone, or in deep areas of cave                                 | 9 ± 11 ( $n = 21$ )      | 15 ± 5 ( $n = 21$ )         | -21.2 ± 2.9‰ ( $n = 22$ )                   | 13.3 ± 2.9 ( $n = 22$ ) | Bolivina spp. (f),                                                                                                                                                                         | Mixing Zone                        |
| Carbonate       | Micrite              | By 6600 ± 210, 6600 ± 70 (core 2) to generally ~3000 to 4000 years ago | 0.2 mm/yr (c 15)                     | Widspread throughout Palm Cave                                            | 19 ± 33 ( $n = 188$ )    | 9 ± 4 ( $n = 188$ )         | -20.4 ± 1.9‰ ( $n = 40$ )                   | 11.7 ± 2.0 ( $n = 40$ ) | <i>Spirophthalmidium enaciatum</i> (f), <i>Sigmollina tenuis</i> (f), <i>Spirillina vivipara</i> , <i>Barbata domingensis</i> (b), bryozoans, sponge spicules, brachiopods, serpulid worms | Oxygenated Saline Groundwater Mass |
| Carbonate       | Mixed Carbonate      | ~3610 ± 480 (core 15)                                                  | 0.5 mm/yr C7                         | Widspread throughout Palm Cave                                            | 71 ± 117 ( $n = 178$ )   | 14 ± 1 ( $n = 178$ )        | -19.4 ± 1.2‰ ( $n = 38$ )                   | 10.3 ± 1.2 ( $n = 38$ ) | <i>Spirophthalmidium enaciatum</i> (f), <i>Sigmollina tenuis</i> (f), <i>Spirillina vivipara</i> , <i>Barbata domingensis</i> (b), bryozoans, sponge spicules, brachiopods, serpulid worms |                                    |

**Table S3** Radiocarbon data ( $n = 51$ ) generated by the National Ocean Sciences Accelerator Mass Spectrometry (NOSAMS) facility at Woods Hole Oceanographic Institution, and all were calibrated to sidereal years before present ( $BP_{1950}$ ) using IntCal 13<sup>5</sup>, with the highest probability  $2\sigma$  result used to frame the results. Other lower probability calibration results do not change the interpretations of the data. Raw calibration data from this table is then rounded to the nearest decade for presentation in Figure 3 in the text, as per radiocarbon convention. The NOSAMS process abbreviations include: (a) gas bench (GB) is the continuous-flow accelerator mass spectrometry technique<sup>6</sup> (CF-AMS), (b) OC is for the standard alkali-acid-alkali organic carbon pretreatment for Standard AMS dating, and (c) HY is for hydrolysis of biogenic carbonate.

| Sample Identifier    | Core | Depth Mid-Point | Material dated | NOSAMS Process Abbreviation | Sample Processing Type | Accession Number | F Modern | Fm Err | Age  | Age Err | $\delta^{13}C$ | D13C Source  | Highest Probability $2\sigma$ Midpoint | Highest Probability $2\sigma$ Uncertainty | Probability |
|----------------------|------|-----------------|----------------|-----------------------------|------------------------|------------------|----------|--------|------|---------|----------------|--------------|----------------------------------------|-------------------------------------------|-------------|
| SM-C2-14.5 cm        | C02  | 14.5            | mollusc        | GB                          | CF-AMS                 | NA               | 0.5372   | 0.0077 | 4991 | 115     | NA             | Not Measured | 5650                                   | 375                                       | 0.949       |
| SM-C2-31.5 cm        | C02  | 31.5            | mollusc        | GB                          | CF-AMS                 | NA               | 0.4824   | 0.0071 | 5855 | 118     | NA             | Not Measured | 6679                                   | 278                                       | 1           |
| SM-C2-32.5-33        | C02  | 32.75           | mollusc        | HY                          | Standard AMS           | OS-112233        | 0.4861   | 0.0016 | 5790 | 25      | 1              | Measured     | 6596                                   | 66                                        | 0.949       |
| SM-C2-47-47.5        | C02  | 47.25           | organic carbon | OC                          | Standard AMS           | OS-112146        | 0.368    | 0.0014 | 8030 | 30      | -25.01         | Measured     | 8934.5                                 | 79.5                                      | 0.719       |
| SM-C2-49.5-50 cm     | C02  | 49.75           | organic carbon | OC                          | Standard AMS           | OS-109436        | 0.3569   | 0.0014 | 8280 | 30      | -24.3          | Measured     | 9263                                   | 71                                        | 0.576       |
| SM-C2-73-74          | C02  | 73.5            | Plant/Wood     | OC                          | Standard AMS           | OS-112147        | 0.3448   | 0.0017 | 8550 | 40      | -26.48         | Measured     | 9519                                   | 34                                        | 1           |
| SM-C3_5-6 cm         | C03  | 5.5             | mollusc        | GB                          | CF-AMS                 | OS-129491        | 0.7645   | 0.0182 | 2160 | 190     | NA             | Not Measured | 2137                                   | 411                                       | 0.935       |
| SM-C3-15.5 cm        | C03  | 15.5            | mollusc        | GB                          | CF-AMS                 | NA               | 0.6721   | 0.0093 | 3192 | 112     | NA             | Not Measured | 3395                                   | 254                                       | 0.987       |
| SM-C3_23-24 cm       | C03  | 23.5            | organic carbon | OC                          | Standard AMS           | OS-119838        | 0.3902   | 0.0017 | 7560 | 35      | -22.32         | Measured     | 8374                                   | 42                                        | 1           |
| SM-C3_59-60 cm       | C03  | 59.5            | organic carbon | OC                          | Standard AMS           | OS-119837        | 0.3816   | 0.0015 | 7740 | 30      | -22.44         | Measured     | 8516.5                                 | 72.5                                      | 1           |
| SM-C3_66-67 cm       | C03  | 66.5            | organic carbon | OC                          | Standard AMS           | OS-119837        | 0.3589   | 0.0015 | 8230 | 35      | -24.21         | Measured     | 9189.5                                 | 116.5                                     | 0.959       |
| SM-C4_24-25 cm       | C04  | 24.5            | organic carbon | OC                          | Standard AMS           | OS-119843        | 0.3836   | 0.0015 | 7700 | 30      | -22.53         | Measured     | 8481.5                                 | 62.5                                      | 1           |
| SM-C4_59-60 cm       | C04  | 59.5            | organic carbon | OC                          | Standard AMS           | OS-119844        | 0.3677   | 0.0014 | 8040 | 30      | -25            | Measured     | 8975                                   | 46                                        | 0.547       |
| SM-C4_72-73 cm       | C04  | 72.5            | organic carbon | OC                          | Standard AMS           | OS-119840        | 0.3596   | 0.0015 | 8220 | 35      | -23.97         | Measured     | 9183                                   | 111                                       | 0.948       |
| SM-C6_10-11 cm       | C06  | 10.5            | mollusc        | GB                          | CF-AMS                 | OS-129493        | 0.6846   | 0.0165 | 3040 | 190     | NA             | Not Measured | 3205                                   | 433                                       | 1           |
| SM-C6_19-20 cm       | C06  | 19.5            | mollusc        | GB                          | CF-AMS                 | OS-129494        | 0.6067   | 0.0151 | 4010 | 200     | NA             | Not Measured | 4436.5                                 | 539.5                                     | 0.996       |
| SM-C6_20-21 cm       | C06  | 20.5            | mollusc        | GB                          | CF-AMS                 | OS-129495        | 0.6501   | 0.016  | 3460 | 200     | NA             | Not Measured | 3764.5                                 | 526.5                                     | 1           |
| SM-C6_70-71 cm       | C06  | 70.5            | organic carbon | OC                          | Standard AMS           | OS-119839        | 0.3576   | 0.0014 | 8260 | 30      | -24.11         | Measured     | 9225                                   | 97                                        | 0.892       |
| SM-C7_10-11 cm       | C07  | 11.5            | mollusc        | GB                          | CF-AMS                 | OS-129497        | 0.9136   | 0.0213 | 725  | 190     | NA             | Not Measured | 717.5                                  | 292.5                                     | 0.96        |
| SM-C7_58-60 cm       | C07  | 58.5            | mollusc        | GB                          | CF-AMS                 | OS-129497        | 0.8621   | 0.0203 | 1190 | 190     | NA             | Not Measured | 1072.5                                 | 344.5                                     | 0.987       |
| SM-C9_7-8 cm         | C09  | 8.5             | mollusc        | GB                          | CF-AMS                 | OS-129499        | 0.8809   | 0.0206 | 1020 | 190     | NA             | Not Measured | 976                                    | 323                                       | 0.99        |
| SM-C9_19-20 cm       | C09  | 19.2            | mollusc        | GB                          | CF-AMS                 | OS-129499        | 0.6332   | 0.0156 | 3670 | 200     | NA             | Not Measured | 4003                                   | 527                                       | 0.999       |
| SM-C9_47-48 cm       | C09  | 47.5            | organic carbon | OC                          | Standard AMS           | OS-122741        | 0.3384   | 0.0016 | 8700 | 35      | -24.42         | Measured     | 9646.5                                 | 99.5                                      | 0.993       |
| SM-C10-D1_15.5-16 cm | C10  | 15.75           | organic carbon | OC                          | Standard AMS           | OS-124667        | 0.3842   | 0.0014 | 7690 | 30      | -23.17         | Measured     | 8479                                   | 62                                        | 1           |
| SM-C10-D2_39-40 cm   | C10  | 109.5           | organic carbon | OC                          | Standard AMS           | OS-122742        | 0.3577   | 0.0017 | 8260 | 35      | -23.37         | Measured     | 9228                                   | 103                                       | 0.86        |
| SM-C10-D2_66-67 cm   | C10  | 136             | organic carbon | OC                          | Standard AMS           | OS-122743        | 0.3493   | 0.0014 | 8450 | 35      | -23.62         | Measured     | 9480                                   | 47                                        | 1           |
| SM-C10-D3_45-46 cm   | C10  | 157             | organic carbon | OC                          | Standard AMS           | OS-122744        | 0.3445   | 0.0019 | 8560 | 45      | -24.29         | Measured     | 9535.5                                 | 61.5                                      | 1           |
| SM-C10-D3_62-63 cm   | C10  | 174.5           | organic carbon | OC                          | Standard AMS           | OS-122745        | 0.3395   | 0.0015 | 8680 | 35      | -23.7          | Measured     | 9624                                   | 80                                        | 0.998       |
| SM-C11_8.5-9 cm      | C11  | 8.75            | organic carbon | OC                          | Standard AMS           | OS-122737        | 0.3567   | 0.0016 | 8280 | 35      | -24.37         | Measured     | 9271                                   | 135                                       | 1           |
| SM-C11_30-31 cm      | C11  | 30.5            | organic carbon | OC                          | Standard AMS           | OS-122738        | 0.3534   | 0.0016 | 8360 | 35      | -24.11         | Measured     | 9382                                   | 87                                        | 1           |
| SM-C12_3-4 cm        | C12  | 4.5             | mollusc        | GB                          | CF-AMS                 | OS-129501        | 0.7263   | 0.0174 | 2570 | 190     | NA             | Not Measured | 2688                                   | 393                                       | 0.948       |
| SM-C12_11-12 cm      | C12  | 11.5            | mollusc        | GB                          | CF-AMS                 | OS-129501        | 0.676    | 0.0163 | 3140 | 190     | NA             | Not Measured | 3298.5                                 | 433.5                                     | 0.977       |
| SM-C14_31-32 cm      | C14  | 31.5            | organic carbon | OC                          | Standard AMS           | OS-135567        | 0.3383   | 0.0013 | 8710 | 30      | -25.88         | Measured     | 9648.5                                 | 97.5                                      | 0.992       |
| SM-C14_86-87 cm      | C14  | 86.5            | organic carbon | OC                          | Standard AMS           | OS-135568        | 0.3369   | 0.0013 | 8740 | 30      | -24.71         | Measured     | 9747.5                                 | 207.5                                     | 0.881       |
| SM-C15_6-7 cm        | C15  | 6.5             | mollusc        | GB                          | CF-AMS                 | OS-129502        | 0.8951   | 0.021  | 890  | 190     | NA             | Not Measured | 859                                    | 324                                       | 0.993       |
| SM-C15_9-10 cm       | C15  | 10.5            | mollusc        | GB                          | CF-AMS                 | OS-129504        | 0.8478   | 0.0214 | 1330 | 200     | NA             | Not Measured | 1261                                   | 365                                       | 0.97        |
| SM-C15_10-11 cm      | C15  | 10.5            | mollusc        | GB                          | CF-AMS                 | OS-129504        | 0.714    | 0.0173 | 2710 | 190     | NA             | Not Measured | 2802.5                                 | 452.5                                     | 0.987       |
| SM-C15_15-16 cm      | C15  | 15.5            | mollusc        | GB                          | CF-AMS                 | OS-129505        | 0.7355   | 0.0175 | 2470 | 190     | NA             | Not Measured | 2502.5                                 | 458.5                                     | 1           |
| SM-C15_19-20 cm      | C15  | 20.5            | mollusc        | GB                          | CF-AMS                 | OS-129507        | 0.7255   | 0.0174 | 2580 | 190     | NA             | Not Measured | 2691                                   | 392                                       | 0.951       |
| SM-C15_39-40 cm      | C15  | 39.5            | mollusc        | GB                          | CF-AMS                 | OS-129507        | 0.6931   | 0.0167 | 2940 | 190     | NA             | Not Measured | 3148.5                                 | 426.5                                     | 1           |
| SM-C15_40-41 cm      | C15  | 40.5            | mollusc        | GB                          | CF-AMS                 | OS-129508        | 0.6595   | 0.016  | 3340 | 190     | NA             | Not Measured | 3613.5                                 | 475.5                                     | 0.991       |
| SM-C15_43-44 cm      | C15  | 43.5            | mollusc        | GB                          | CF-AMS                 | OS-129509        | 0.633    | 0.0163 | 3670 | 210     | NA             | Not Measured | 4014                                   | 556                                       | 1           |
| SM-C15_48-49 cm      | C15  | 49.5            | mollusc        | GB                          | CF-AMS                 | OS-129511        | 0.6481   | 0.0159 | 3480 | 200     | NA             | Not Measured | 3812.5                                 | 485.5                                     | 0.982       |
| SM-C15_54-55 cm      | C15  | 54.5            | mollusc        | GB                          | CF-AMS                 | OS-129478        | 0.6264   | 0.0153 | 3760 | 200     | NA             | Not Measured | 4130                                   | 517                                       | 0.981       |
| SM-C15_63-64 cm      | C15  | 64.5            | mollusc        | GB                          | CF-AMS                 | OS-129480        | 0.5941   | 0.015  | 4180 | 200     | NA             | Not Measured | 4761.5                                 | 538.5                                     | 0.986       |
| SM-C15_64-65 cm      | C15  | 64.5            | mollusc        | GB                          | CF-AMS                 | OS-129480        | 0.6087   | 0.0151 | 3990 | 200     | NA             | Not Measured | 4427.5                                 | 541.5                                     | 1           |
| SM-C15_65-66 cm      | C15  | 66.5            | mollusc        | GB                          | CF-AMS                 | OS-129482        | 0.5243   | 0.0136 | 5190 | 210     | NA             | Not Measured | 5991.5                                 | 412.5                                     | 0.987       |
| SM-C15_66.5 cm       | C15  | 67.5            | mollusc        | HY                          | Standard AMS           | OS-129619        | 0.5938   | 0.0015 | 4190 | 20      | 1.23           | Measured     | 4726                                   | 36                                        | 0.595       |
| SM-C15_71 cm         | C15  | 71              | Plant/Wood     | OC                          | Standard AMS           | OS-129934        | 0.3616   | 0.0014 | 8170 | 30      | NA             | Not Measured | 9081.5                                 | 63.5                                      | 0.793       |
| SM-C15_79-80 cm      | C15  | 79.5            | organic carbon | OC                          | Standard AMS           | OS-122740        | 0.339    | 0.0019 | 8690 | 45      | -27.51         | Measured     | 9661.5                                 | 121.5                                     | 0.995       |
| SM-C15_79-80 cm      | C15  | 79.5            | organic carbon | OC                          | Standard AMS           | OS-129829        | 0.3383   | 0.0015 | 8710 | 35      | -26.81         | Measured     | 9665                                   | 117                                       | 0.996       |

**Table S4** Different in mineralogy between the terra rosa paleosols and iron-rich sedimentary units. Some samples were re-analyzed after treatment with 10% HCl to observe remaining minerals after removal of carbonates (aragonite and calcite), and amplify the XRD-signal of the non-acidified mineral residue.

| Core | Depth Interval | Sedimentary unit    | Pretreatment               | Minerals (Relative Abundance %) |                 |                |            |               |                |                |                    |           |               |           |             |
|------|----------------|---------------------|----------------------------|---------------------------------|-----------------|----------------|------------|---------------|----------------|----------------|--------------------|-----------|---------------|-----------|-------------|
|      |                |                     |                            | Crandallite                     | Kaolinite       | Quartz         | Goethite   | Pyrite        | Aragonite      | Calcite        | Woodhouseite       | Maghemite | Lepidocrocite | Rectorite | Montroseite |
| 8    | 5-6            |                     | none                       | 43.5                            | 12.2            | 39.1           | 5.2        | 0             | 0              | 0              | 0                  | 0         | 0             | 0         | 0           |
| 8    | 10-11          |                     | none                       | 50.3                            | 14.7            | 28.8           | 6.3        | 0             | 0              | 0              | 0                  | 0         | 0             | 0         | 0           |
| 8    | 15-16          | terra rosa paleosol | none                       | 58                              | 17.7            | 16.6           | 7.7        | 0             | 0              | 0              | 0                  | 0         | 0             | 0         | 0           |
| 13   | 35-36          |                     | none                       | 50                              | 17.4            | 20.5           | 12.1       | 0             | 0              | 0              | 0                  | 0         | 0             | 0         | 0           |
| 13   | 40-41          |                     | none                       | 61                              | 20.6            | 9.3            | 9          | 0             | 0              | 0              | 0                  | 0         | 0             | 0         | 0           |
|      |                |                     | <i>Arithmetic averages</i> | <i>52.6</i>                     | <i>16.5</i>     | <i>22.9</i>    | <i>8.1</i> | <i>0</i>      | <i>0</i>       | <i>0</i>       | <i>0</i>           | <i>0</i>  | <i>0</i>      | <i>0</i>  | <i>0</i>    |
| 14   | 14             |                     | none                       | 0                               | 0               | 0              | 0          | 0             | 53.3           | 36.4           | 9.4                | 0         | 0.9           | 0         | 0           |
| 14   | 14             |                     | 10% HCl                    | 0                               | 0               | 87.5           | 2.8        | 0             | 0              | 0              | 6.2                | 0         | 0             | 2.4       | 1.1         |
| 15   | 15             |                     | none                       | 25.8                            | 17.3            | 8.2            | 30.3       | 18.4          | 0              | 0              | 0                  | 0         | 0             | 0         | 0           |
| 4    | 7              |                     | none                       | 0                               | 0               | 0              | 0          | 0             | 68.4           | 31.6           | 0                  | 0         | 0             | 0         | 0           |
| 4    | 7              |                     | 10% HCl                    | 0                               | 17.2            | 22.3           | 0          | 0             | 8.1            | 1.2            | 39.9               | 9.2       | 2.1           | 0         | 0           |
| 4    | 16             | iron and carbonate  | none                       | 0                               | 16.7            | 28.4           | 20.7       | 0             | 0              | 26.8           | 7.4                | 0         | 0             | 0         | 0           |
| 4    | 16             |                     | 10% HCl                    | 0                               | 23.1            | 10.8           | 37.2       | 0             | 0              | 2              | 26.9               | 0         | 0             | 0         | 0           |
| 10   | 13             |                     | none                       | 0                               | 0               | 67.8           | 3.7        | 0             | 0              | 27.8           | 0                  | 0         | 0.7           | 0         | 0           |
| 10   | 13             |                     | 10% HCl                    | 0                               | 4.4             | 82.6           | 6.9        | 0             | 0              | 0              | 5                  | 0         | 1             | 0         | 0           |
| 10   | 145            |                     | none                       | 0                               | 0               | 61.6           | 2.9        | 0             | 0              | 27.9           | 4.4                | 0         | 3.2           | 0         | 0           |
| 10   | 145            |                     | 10% HCl                    | 0                               | 0               | 87.7           | 3.9        | 0             | 0              | 0.4            | 4.8                | 0         | 3.2           | 0         | 0           |
|      |                |                     | <i>Arithmetic averages</i> | <i>5.16</i>                     | <i>5.666667</i> | <i>27.6667</i> | <i>9.6</i> | <i>3.0667</i> | <i>20.2833</i> | <i>25.0833</i> | <i>3.533333333</i> | <i>0</i>  | <i>0.8</i>    | <i>0</i>  | <i>0</i>    |

## References

- 1 Patterson, R. T. & Fishbein, E. Re-examination of the statistical methods used to determine the number of point counts needed for micropaleontological quantitative research. *J. Paleontol.* **63**, 245-248 (1989).
- 2 Carmen, K. W. *The shallow-water foraminifera of Bermuda* PhD thesis, Massachusetts Institute of Technology, (1927).
- 3 van Hengstum, P. J. & Scott, D. B. Ecology of foraminifera and habitat variability in an underwater cave: distinguishing anchialine versus submarine cave environments. *J. Foraminif. Res.* **41**, 201-229 (2011).
- 4 Loeblich, A. R., Jr., & Tappan, H. *Foraminiferal genera and their classification*. Vol. 2 vols (Van Nostrand Reinhold Company, 1987).
- 5 Reimer, P. J. *et al.* IntCal13 and Marine13 radiocarbon age calibration curves 0-50,000 years Cal BP. *Radiocarbon* **55**, 1869-1887 (2013).
- 6 McIntyre, C. P. *et al.* Rapid radiocarbon (<sup>14</sup>C) analysis of coral and carbonate samples using a continuous-flow accelerator mass spectrometry system. *Paleoceanography* **26**, 6 (2011).
